# Supplementary material for: Detection and characterization of impurities in commercial products with Fourier transform microwave spectroscopy
Source: Royal Society of Chemistry journal article supplement (doi:10.1039/c3an36652a), 2013-01-01
Supplement: c3an36652a.pdf [file c3an36652a.pdf]

## Supplementary Information

### Detection and characterization of impurities in commercial products with Fourier transform microwave spectroscopy

Biagio Velino, Laura B. Favero, Paolo Ottaviani, Assimo Maris, Walther Caminati\*

Table 1s: Fitting of the average frequencies of the experimental transition frequencies of methyl pyruvate measured as impurity of methyl lactate.

```
1  FINAL RESULTS OF          MLAC X righe "b" 2
   A = 5328.651282+- .153714      B = 1939.527434+- .056183
   C = 1450.006535+- .038469      DJ = -.000731+- .000441
   DJK= -.043672+- .013159      DK = .147688+- .040375

*FIXED*      :DDJ= .000000 :DDK= .000000 :
```

| #  | TRANSITION  | MEASURED  | CALCULATED | DIFFERENCE |
|----|-------------|-----------|------------|------------|
| 1  | 2 1 2 1 0 1 | 9678.718  | 9678.809   | -.091      |
| 2  | 3 1 3 2 0 2 | 12354.300 | 12354.270  | .029       |
| 3  | 4 1 4 3 0 3 | 14869.317 | 14869.240  | .077       |
| 4  | 5 1 5 4 0 4 | 17315.441 | 17315.492  | -.051      |
| 5  | 3 0 3 2 0 2 | 9974.709  | 9974.753   | -.044      |
| 6  | 4 0 4 3 0 3 | 13092.946 | 13092.896  | .050       |
| 7  | 5 0 5 4 0 4 | 16084.424 | 16084.342  | .082       |
| 8  | 3 1 3 2 1 2 | 9405.278  | 9405.258   | .020       |
| 9  | 5 1 5 4 1 4 | 15539.070 | 15539.148  | -.078      |
| 10 | 4 0 4 3 1 3 | 10713.352 | 10713.379  | -.026      |
| 11 | 2 2 1 1 1 0 | 17434.646 | 17434.729  | -.083      |
| 12 | 2 2 0 1 1 1 | 17973.627 | 17973.545  | .082       |

  

```
INERTIAL PARAMETERS:
IN. DEF.= -6.87426      IA, IB, IC= 94.84184 260.56816 348.53574
SIGMA = .091           PA, PB, PC= 257.13103 91.40471 3.43713
```
